# Supplementary material for: Mononuclear indium(iii) photosensitizers for photo-dehalogenation and olefin reduction
Source: Royal Society of Chemistry journal article supplement (doi:10.1039/d3cc05273g), 2024-01-01
Supplement: d3cc05273g1.pdf [file d3cc05273g1.pdf]

*Electronic Supplementary Information (ESI)*

**Mononuclear indium(III) photosensitizers for photo-  
dehalogenation and olefin reduction**

Li-Zhi Fu,<sup>a</sup> Piao He,<sup>a</sup> Jia-Wei Wang,<sup>b</sup> Fan Ma,<sup>a</sup> Chao Liu,<sup>a</sup> Guo Chen,<sup>a</sup> Xiao-Yi Yi\*<sup>a</sup>

<sup>a</sup> College of Chemistry and Chemical Engineering, Central South University, Changsha, Hunan 410083, P. R. China

<sup>b</sup> School of Chemical Engineering and Technology, Sun Yat-sen University, Zhuhai 519082, China

Email: [xyyi@csu.edu.cn](mailto:xyyi@csu.edu.cn)

Phone: 86-731-88879616

## Contents

|                                                                             |    |
|-----------------------------------------------------------------------------|----|
| 1. General Conidations .....                                                | 3  |
| 1.1 Materials .....                                                         | 3  |
| 1.2 Characterization.....                                                   | 3  |
| 2. Experimental Procedures and Spectroscopic Data .....                     | 4  |
| 3. Crystallographic Data .....                                              | 13 |
| 4. DFT Calculation.....                                                     | 15 |
| 5. Absorption and Emission Spectra in Various Solvents.....                 | 25 |
| 6. Cyclic Voltammetry .....                                                 | 27 |
| 7. Photoredox Catalysis .....                                               | 28 |
| 7.1 Experimental setup for photoredox reactions .....                       | 28 |
| 7.2 Indium(III) photosensitizers for photo-dehalogenation.....              | 29 |
| 7.3 Indium(III) photosensitizers for reduction of cis-diethyl maleate ..... | 32 |
| 8. References.....                                                          | 34 |

## 1. General Coniditions

### 1.1 Materials

All syntheses were carried using a standard vacuum line and Schlenk technology with an atmosphere of purified argon. Solvents for air- and moisture-sensitive manipulations were dried and deoxygenated using a JC-Meyer Phoenix solvent drying system. The ligands **HL1** (2-(1Hpyrrol-2-yl)pyridine), **HL2** (2-(4-methyl-1H-pyrrol-2-yl)pyridine), **HL3** (2-(3,5-dimethyl-1H-pyrrol-2-yl)pyridine), and **HL4** (2-(3,4,5-trimethyl-1H-pyrrol-2-yl)pyridine) were prepared according to literature methods.<sup>1, 2</sup> All other chemicals were obtained from J&K Scientific Ltd and used without further purification.

### 1.2 Characterization

The <sup>1</sup>H NMR spectra were recorded on a Bruker AVANCE (III) 400M spectrometer. The infrared spectra (in KBr) were recorded on a Nicolet 6700 spectrometer FT-IR spectrophotometer. The UV-Vis spectra were recorded on an Agilent Technologies Cary 8454 UV-Vis spectrometer at ambient temperature with a 1 cm quartz cell. ESI-MS was performed on a Bruker Daltonik GmbH, Bremen mass spectrometer equipped with an electrospray ionization (ESI) source. Emission spectra were recorded on a F97Pro Fluorescence spectrometer. The quantum yields were carried out on a fluorescence spectrometer (F-7000, Hitachi, Japan) equipped with an integrating sphere, which was also reproduced on fluorescence spectrometer (FLS 1000, Edinburgh Instruments LTD.). The excited-state lifetimes ( $\tau$ ) were conducted on a modular fluorescent life and steady-state fluorescence spectrometer (FLS 1000, Edinburgh Instruments LTD.). The photocatalytic reaction experiments are performed by the Perfect Light PCX50C photochemistry system. Cyclic voltammetry was performed on a CHI Instruments CHI660e electrochemical analyzer. The working electrode was a glassy carbon electrode, the counter electrode is a Pt wire, and the reference electrode is an Ag/AgCl electrode in saturated KCl. Electrochemical measurements were performed in acetonitrile solution containing 0.1 M tBu<sub>4</sub>N<sup>+</sup>PF<sub>6</sub><sup>-</sup> electrolyte in a one compartment cell. All potentials were converted to E<sub>1/2</sub> vs. Cp<sub>2</sub>Fe<sup>+0</sup> in CH<sub>3</sub>CN by adding -0.43 V to the measured potential.

X-ray Diffraction Studies: Diffraction data was record on a Bruker CCD diffractometer with monochromatized Mo-K $\alpha$  radiation ( $\lambda = 0.71073 \text{ \AA}$ ). The collected frames are processed using the software SAINT. The absorption correction was processed with SADABS. The structure was solved by a direct method and refined using a full matrix least squares method on F<sup>2</sup> with the SHELXTL software package. Atomic positions of non-hydrogen atoms were refined with anisotropic parameters. All hydrogen atoms were introduced at their geometrical positions and refined as riding atoms.

DFT calculations were performed by using the Gaussian 09 package. Geometry optimizations were performed on the ground state structures with the Becke's three-parameter B3LYP exchange-correlation functional. The all-electron Gaussian basis

sets were those developed by the Ahlrichs group. The slightly smaller polarized split-valence def2-SVP basis sets for H, C, N and triple- $\zeta$  quality basis sets def2-TZVP with one set of polarization functions for the In atom. Vibrational frequencies were calculated based on the optimized structures to confirm the absence of imaginary frequencies. MOs of complexes were calculated and visualized as well. The excited states calculations were carried out on the basis of the optimized S0 structures via time-dependent DFT (TD-DFT) at the same level. The solvation effects were also taken into account using the self-consistent reaction field (SCRF) and a universal solvation model density (SMD) with the CH<sub>3</sub>CN solvent.

## 2. Experimental Procedures and Spectroscopic Data

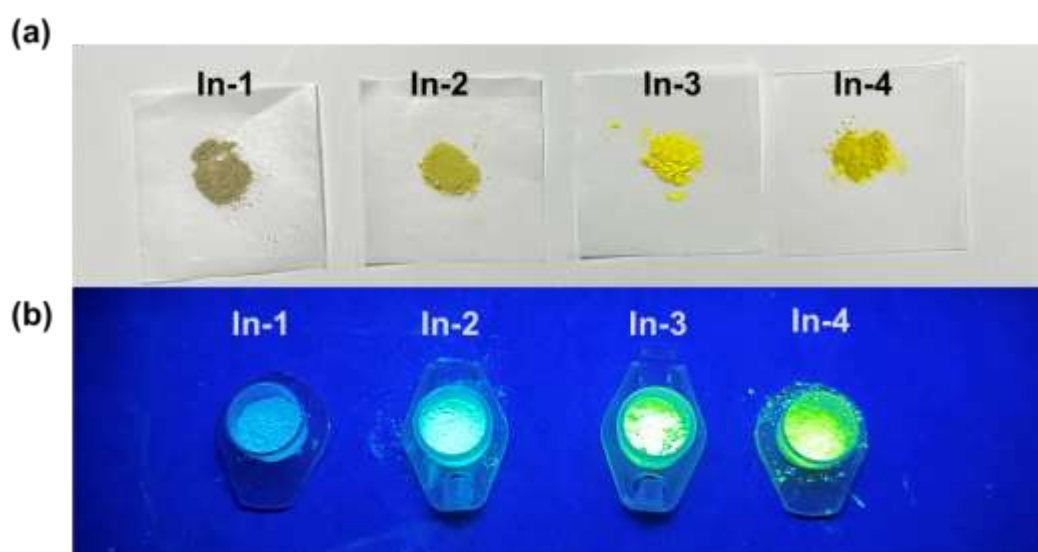

**Figure S1.** (a) solid samples of **In-1** – **In-4**; (b) solid samples of **In-1** – **In-4** upon irradiation at 365 nm at room temperature.

**Synthesis of In-1:** InMe<sub>3</sub> (48.0 mg, 0.3 mmol) was slowly added to the solution of **HL1** (140.0 mg, 1.0 mmol) in toluene (5 mL). The reaction mixture was stirred for 2 hours at room temperature then heated to reflux overnight under nitrogen atmosphere to give a green solution. After cooling, toluene was removed in vacuo. The solid residue was washed three times with diethyl ether to remove any unreacted **HL1**. The crude product was redissolved in CH<sub>2</sub>Cl<sub>2</sub> and filtered. Recrystallized by the addition of diethyl ether to give the desired product **In-1** as a grey green solid. Yield: 101 mg (62%). The solution of **In-1** in CH<sub>2</sub>Cl<sub>2</sub> was layered by hexane to give block single crystals which were suitable for X-ray diffraction analysis.

<sup>1</sup>H NMR (400 MHz, CDCl<sub>3</sub>) δ 8.33 (d, J = 5.0 Hz, 1H), 7.77 – 7.70 (m, 1H), 7.64 (d, J = 8.2 Hz, 1H), 7.16 – 7.06 (m, 1H), 6.88 (dd, J = 3.4, 1.0 Hz, 1H), 6.73 (dd, J = 1.7, 1.1 Hz, 1H), 6.30 (dd, J = 3.3, 2.0 Hz, 1H).

ESI-MS (m/z): 567.1044, calcd. 567.0759 for [M + K]<sup>+</sup>.

IR (KBr, cm<sup>-1</sup>): 1604 (s), 1525 (s), 1444 (s), 1390 (m), 1274 (m), 1159 (m), 1051 (m), 1000 (m), 944 (s), 728 (s), 518 (w).

**Synthesis of In-2:** InMe<sub>3</sub> (80.0 mg, 0.5 mmol) was slowly added to the solution of **HL2** (260.0 mg, 1.65 mmol) in toluene (5 mL). The reaction mixture was stirred for 2 hours at room temperature then heated to reflux overnight under nitrogen atmosphere to give a dark-green solution. After cooling, toluene was removed in vacuo. The solid residue was washed three times with diethyl ether to remove any unreacted **HL2**. The crude product was redissolved in CH<sub>2</sub>Cl<sub>2</sub> and filtered. Recrystallized by the addition of diethyl ether to give the desired product **In-2** as a yellow solid. Yield: 152.4 mg (52%).

<sup>1</sup>H NMR (400 MHz, CDCl<sub>3</sub>) δ 7.58 (dd, J = 14.8, 6.6 Hz, 2H), 7.48 (d, J = 8.2 Hz, 1H), 6.81 (t, J = 6.1 Hz, 1H), 6.67 (s, 1H), 6.48 (s, 1H), 2.20 – 2.06 (m, 3H).

ESI-MS (m/z): 585.0781, calcd. 585.1252 for [M]<sup>+</sup>.

IR (KBr, cm<sup>-1</sup>): 2919 (w), 2963 (w), 1601 (s), 1542 (m), 1439 (s), 1361 (m), 1288 (w), 1153 (w), 1105 (w), 964 (s), 769 (w), 615 (w), 489 (w).

**Synthesis of In-3:** InMe<sub>3</sub> (95.94 mg, 0.6 mmol) was slowly added to the solution of **HL3** (292.6 mg, 1.7 mmol) in toluene (5 mL). The reaction mixture was stirred for 2 hours at room temperature then heated to reflux overnight under nitrogen atmosphere to give a yellow solution. After cooling, toluene was removed in vacuo. The solid residue was washed three times with diethyl ether to remove any unreacted **HL3**. The crude product was redissolved in CH<sub>2</sub>Cl<sub>2</sub> and filtered. Recrystallized by the addition of diethyl ether to give the desired product **In-3** as a light-yellow solid. Yield: 263.8 mg (70%). The solution of **In-3** in CH<sub>2</sub>Cl<sub>2</sub> was layered by hexane to give block yellow single crystals which were suitable for X-ray diffraction analysis.

<sup>1</sup>H NMR (400 MHz, CDCl<sub>3</sub>) δ 7.57 – 7.49 (m, 6H), 7.43 (dd, J = 10.2, 4.7 Hz, 2H), 7.28 (d, J = 5.6 Hz, 1H), 6.73 (t, J = 5.6 Hz, 1H), 6.70 – 6.66 (m, 1H), 6.57 (s, 1H), 5.86 (s, 2H), 5.81 (s, 1H), 2.38 – 2.35 (m, 9H), 1.83 (s, 3H), 1.75 (d, J = 9.2 Hz, 6H).

ESI-MS (m/z): 628.1288, calcd. 628.1800 for [M]<sup>+</sup>.

IR (KBr, cm<sup>-1</sup>): 3068 (w), 2910 (w), 1606 (m), 1531 (m), 1484 (s), 1346 (m), 1272 (m), 1159 (w), 1024 (w), 971 (m), 777 (m), 671 (w).

**Synthesis of In-4:** InMe<sub>3</sub> (48.0 mg, 0.3 mmol) was slowly added to the solution of **HL4** (148.9 mg, 0.8 mmol) in toluene (5 mL). The reaction mixture was stirred for 2 hours at room temperature then heated to reflux overnight under nitrogen atmosphere to give a yellow solution. After cooling, toluene was removed in vacuo. The solid residue was washed three times with diethyl ether to remove any unreacted **HL4**. The crude product was redissolved in CH<sub>2</sub>Cl<sub>2</sub> and filtered. Recrystallized by the addition of diethyl ether to give the desired product **In-4** as a yellow solid. Yield: 100.5 mg (50%).

<sup>1</sup>H NMR (400 MHz, CDCl<sub>3</sub>) δ 7.56 – 7.44 (m, 6H), 7.40 (d, J = 5.3 Hz, 1H), 7.34 – 7.27 (m, 2H), 6.72 – 6.47 (m, 3H), 2.28 (d, J = 4.1 Hz, 9H), 1.91 (dd, J = 17.5, 6.5 Hz, 9H), 1.72 (dd, J = 13.4, 8.0 Hz, 9H).

ESI-MS (m/z): 670.1716, calcd. 670.2270 for [M]<sup>+</sup>.

IR (KBr, cm<sup>-1</sup>): 2911 (m), 2854 (m), 1602 (s), 1473 (s), 1351 (s), 1251 (m), 1159 (m), 1006 (m), 939 (m), 773 (m), 669 (w).

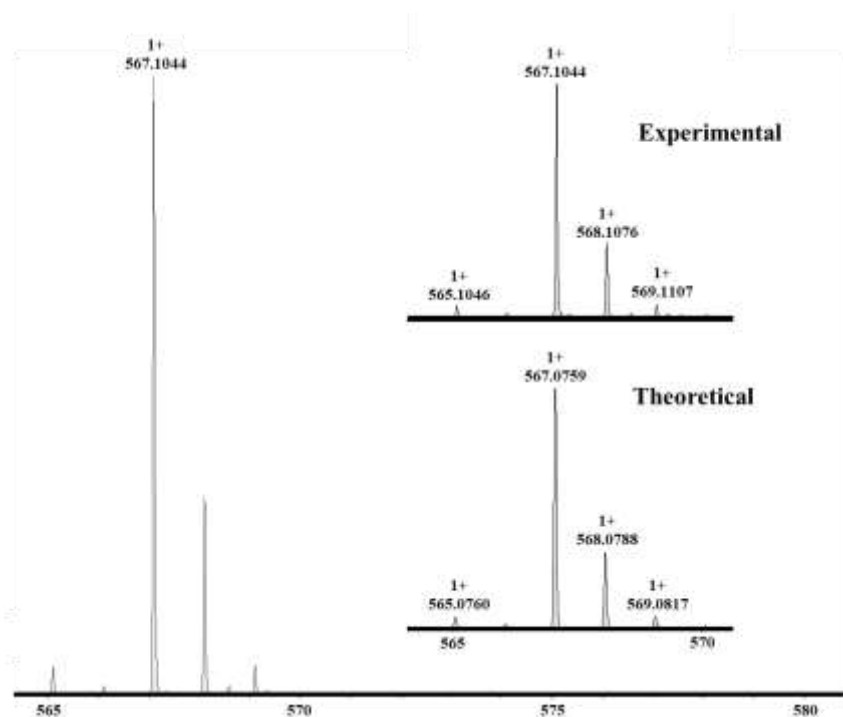

**Figure S2.** ESI-MS spectrum of complex **In-1** in  $\text{CH}_3\text{CN}$ . Inset: the comparison of observed and predicted isotope distribution.

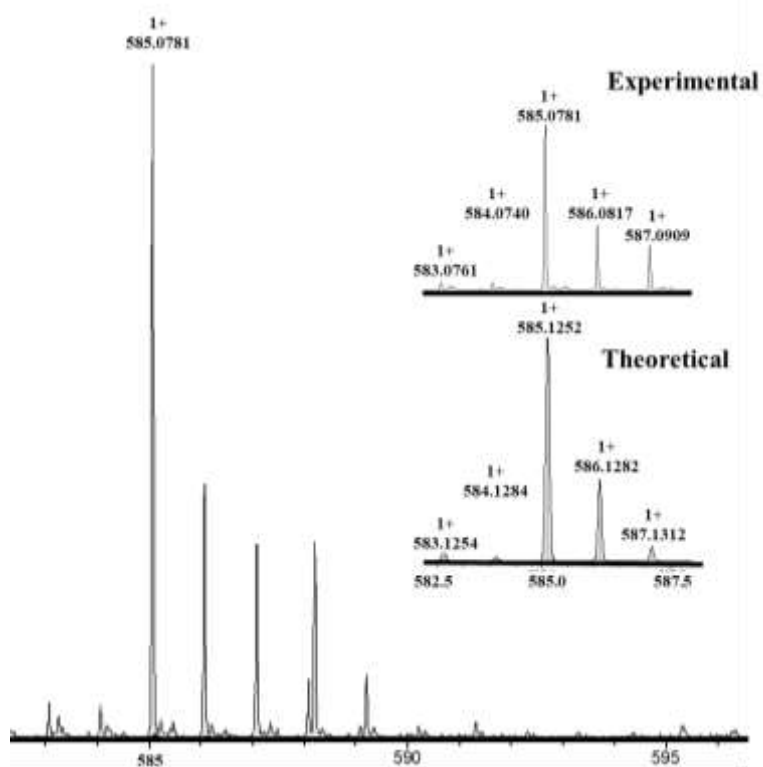

**Figure S3.** ESI-MS spectrum of complex **In-2** in  $\text{CH}_3\text{CN}$ . Inset: the comparison of observed and predicted isotope distribution.

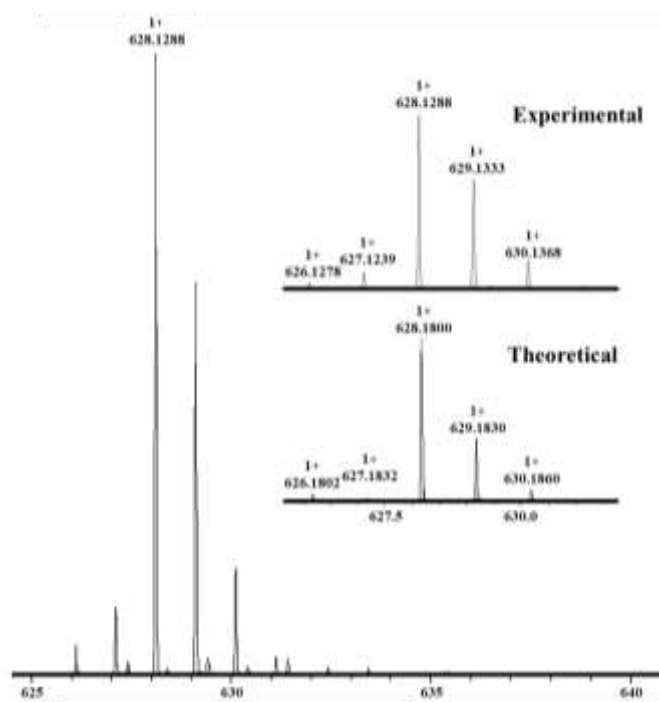

**Figure S4.** ESI-MS spectrum of complex **In-3** in  $\text{CH}_3\text{CN}$ . Inset: the comparison of observed and predicted isotope distribution.

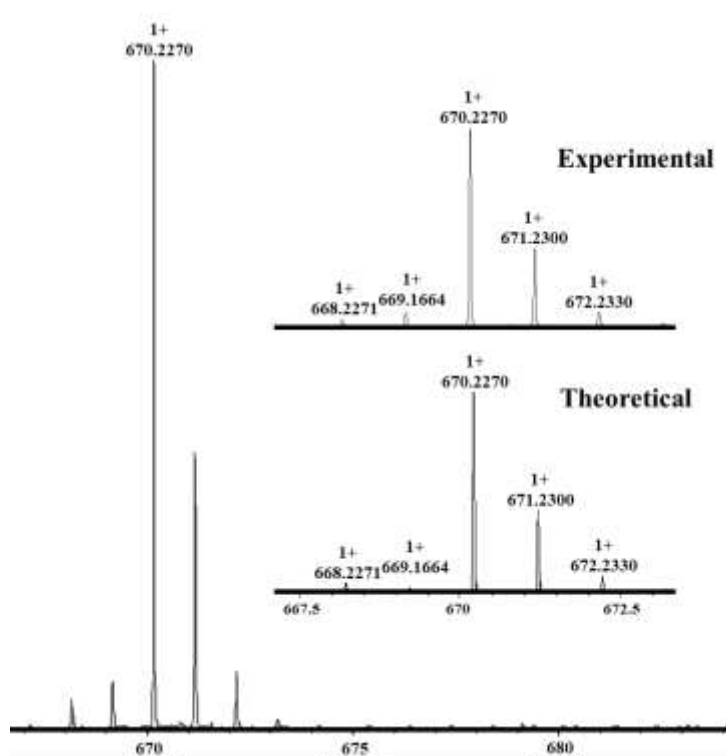

**Figure S5.** ESI-MS spectrum of complex **In-4** in  $\text{CH}_3\text{CN}$ . Inset: the comparison of observed and predicted isotope distribution.



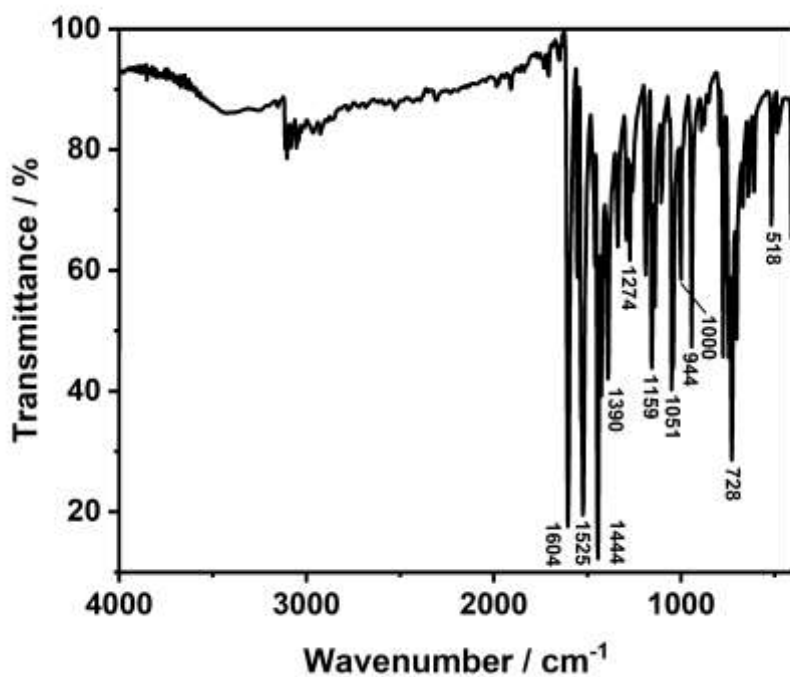

Figure S6. IR spectrum of complex In-1.

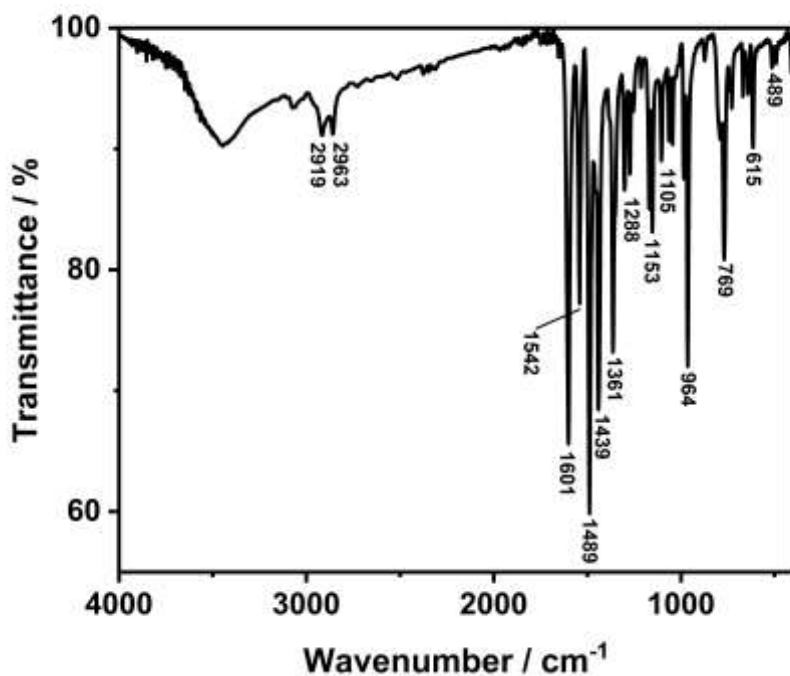

Figure S7. IR spectrum of complex In-2.

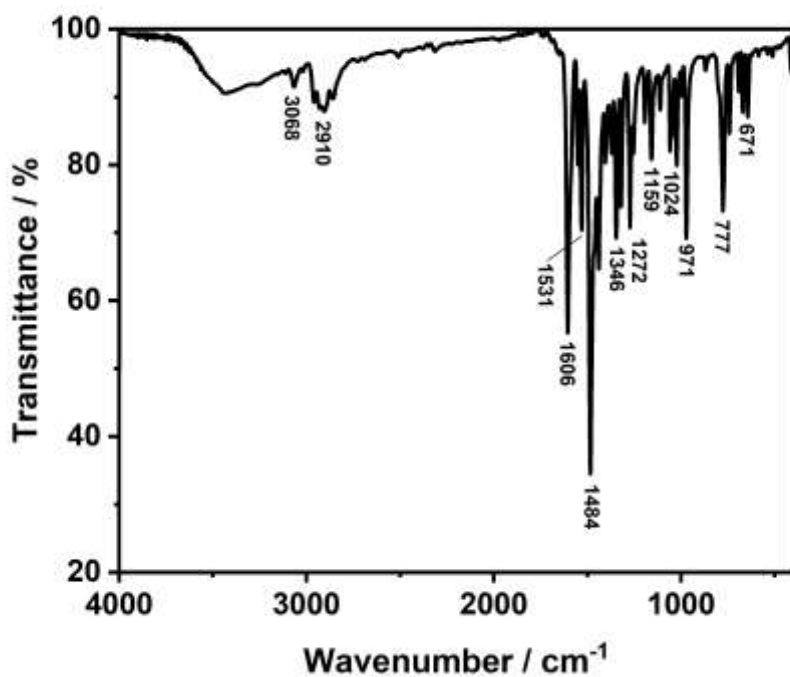

Figure S8. IR spectrum of complex In-3.

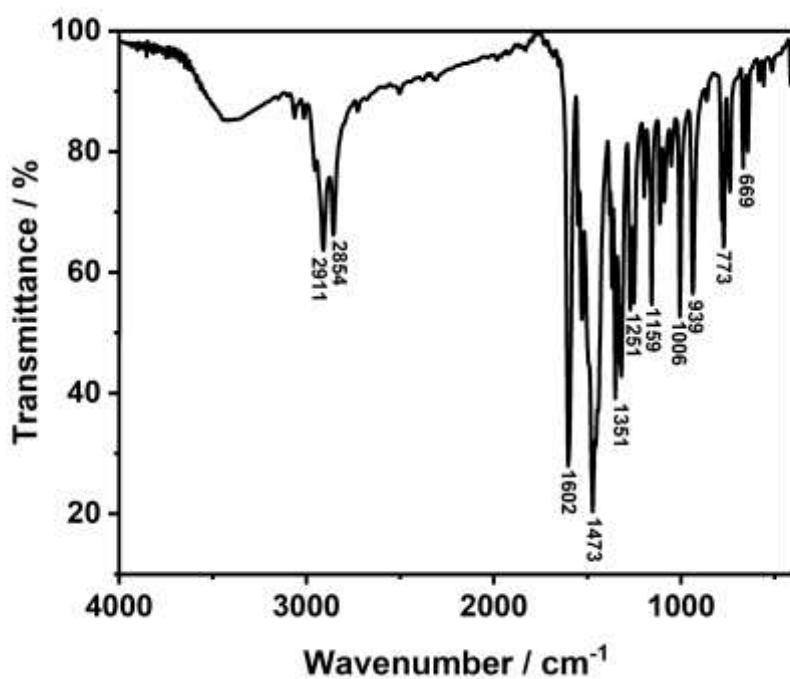

Figure S9. IR spectrum of complex In-4.

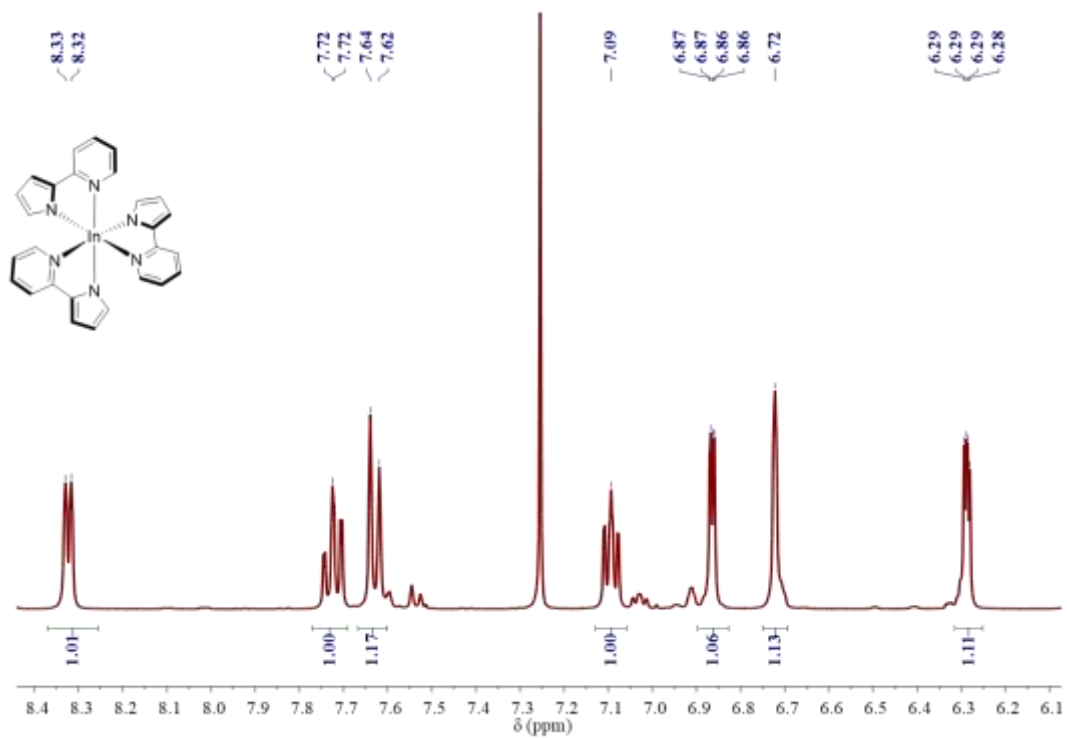

**Figure S10.**  $^1\text{H}$  NMR spectrum of complex **In-1** in  $\text{CDCl}_3$ .

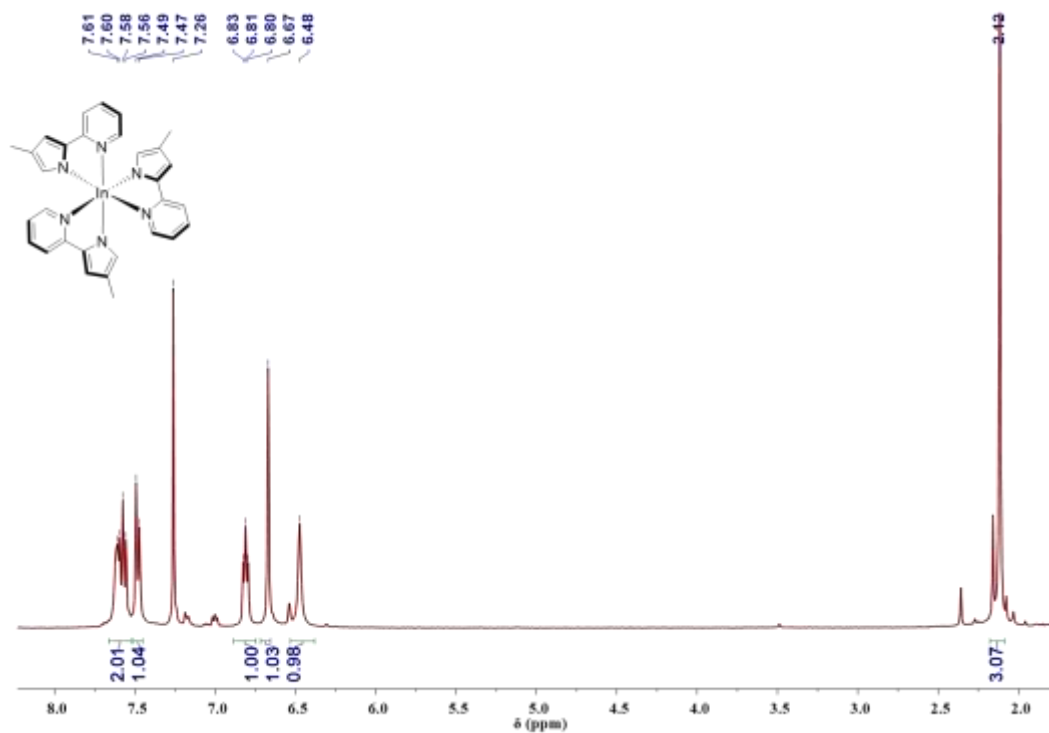

**Figure S11.**  $^1\text{H}$  NMR spectrum of complex **In-2** in  $\text{CDCl}_3$ .

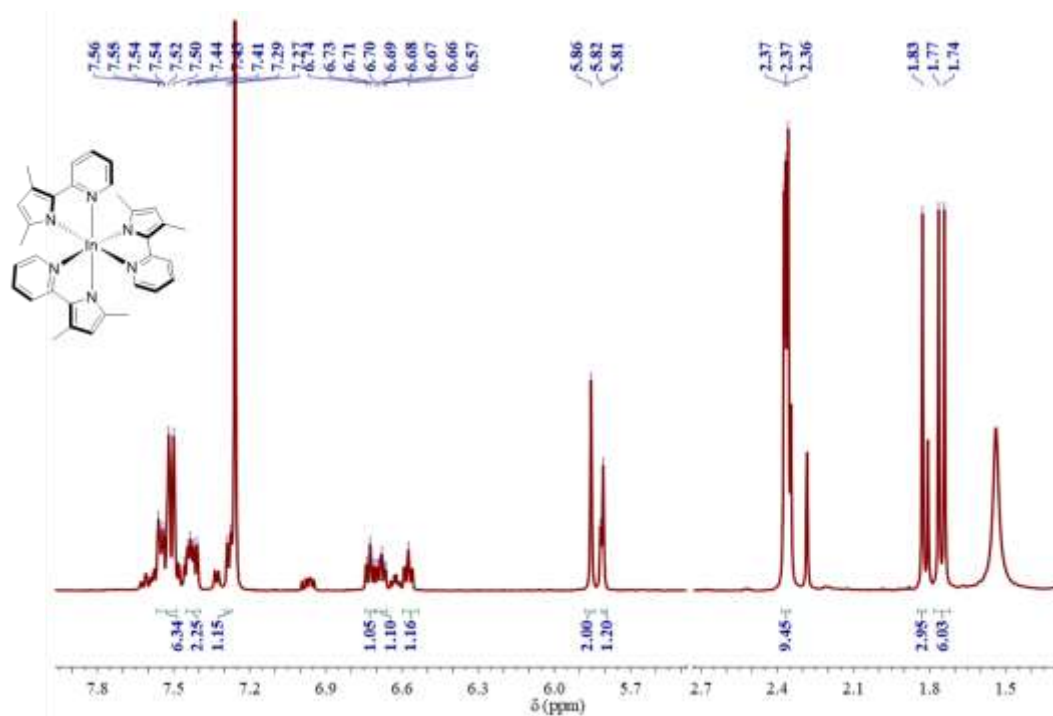

Figure S12. <sup>1</sup>H NMR spectrum of complex **In-3** in CDCl<sub>3</sub>.

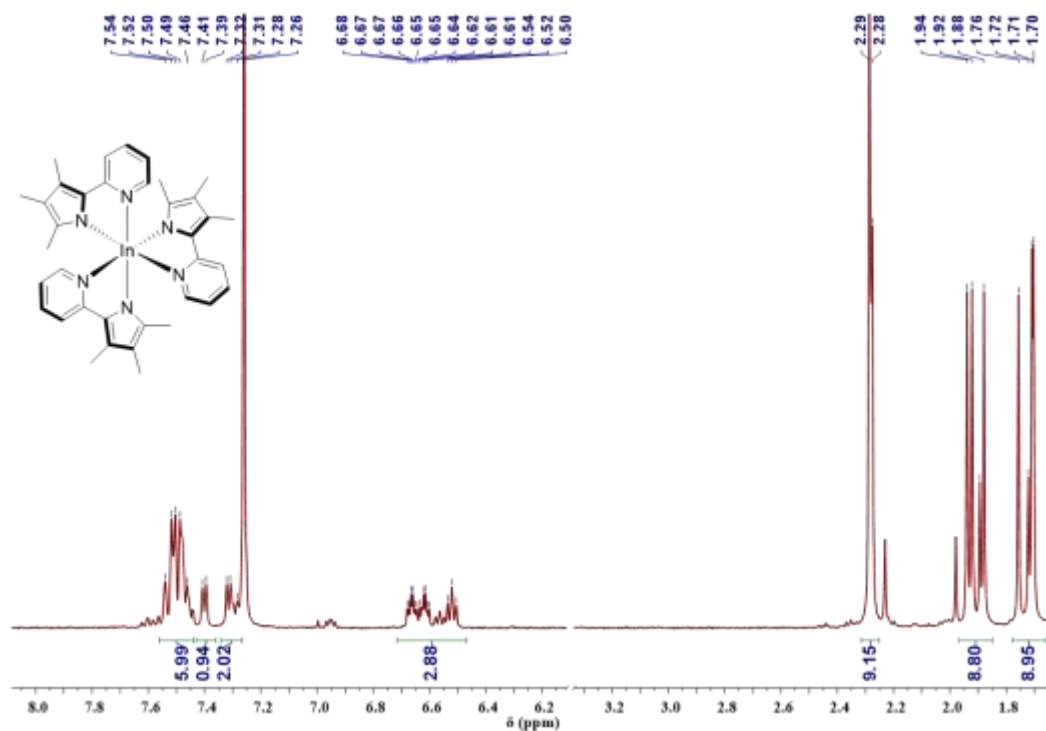

Figure S13. <sup>1</sup>H NMR spectrum of complex **In-4** in CDCl<sub>3</sub>.

### 3. Crystallographic Data

**Table S1.** X-ray crystallographic data for complexes **In-1** and **In-3**.

| Compound                                       | <b>In-1</b>                                                   | <b>In-3</b>                                                   |
|------------------------------------------------|---------------------------------------------------------------|---------------------------------------------------------------|
| Empirical formula                              | C <sub>27</sub> H <sub>21</sub> InN <sub>6</sub>              | C <sub>33</sub> H <sub>33</sub> InN <sub>6</sub>              |
| CCDC number                                    | 2257308                                                       | 2257309                                                       |
| Formula weight                                 | 544.32                                                        | 628.47                                                        |
| T/K                                            | 296(2)                                                        | 296.15                                                        |
| Crystal system                                 | monoclinic                                                    | triclinic                                                     |
| Space group                                    | P2 <sub>1</sub> /c                                            | P-1                                                           |
| a/Å                                            | 16.1797(10)                                                   | 9.9431(2)                                                     |
| b/Å                                            | 15.4641(10)                                                   | 10.4086(2)                                                    |
| c/Å                                            | 9.7077(6)                                                     | 14.7800(3)                                                    |
| α/°                                            | 90                                                            | 83.547(2)                                                     |
| β/°                                            | 99.032(3)                                                     | 80.2990(10)                                                   |
| γ/°                                            | 90                                                            | 74.8850(10)                                                   |
| V/Å <sup>3</sup>                               | 2398.8(3)                                                     | 1451.83(5)                                                    |
| Z                                              | 4                                                             | 2                                                             |
| ρ <sub>calc</sub> /g·cm <sup>-3</sup>          | 1.507                                                         | 1.438                                                         |
| μ/mm <sup>-1</sup>                             | 1.012                                                         | 0.847                                                         |
| F(000)                                         | 1096.0                                                        | 644.0                                                         |
| Reflections collected                          | 16047                                                         | 18624                                                         |
| Independent reflections                        | 5342 [R <sub>int</sub> = 0.0204, R <sub>sigma</sub> = 0.0280] | 6583 [R <sub>int</sub> = 0.0284, R <sub>sigma</sub> = 0.0403] |
| Data/restraints/parameters                     | 5342/102/286                                                  | 6583/216/466                                                  |
| <sup>a</sup> Goodness-of-fit on F <sup>2</sup> | 1.061                                                         | 1.045                                                         |
| <sup>b</sup> Final R indexes [I ≥ 2σ(I)]       | R <sub>1</sub> = 0.0950, wR <sub>2</sub> = 0.2616             | R <sub>1</sub> = 0.0455, wR <sub>2</sub> = 0.1146             |
| Final R indexes [all data]                     | R <sub>1</sub> = 0.1196, wR <sub>2</sub> = 0.2811             | R <sub>1</sub> = 0.0634, wR <sub>2</sub> = 0.1232             |

<sup>a</sup>GoF =  $[\sum w(|F_o| - |F_c|)^2 / (N_{\text{obs}} - N_{\text{param}})]^{1/2}$ .

<sup>b</sup>R<sub>1</sub> =  $\sum ||F_o| - |F_c|| / \sum |F_o|$ . <sup>c</sup>wR<sub>2</sub> =  $[(\sum w|F_o| - |F_c|)^2 / \sum w^2|F_o|^2]^{1/2}$ .

**Table S2.** Selected bond lengths (Å) and angles (°)

| Compound    | In-1             | In-3       |
|-------------|------------------|------------|
|             | Bond lengths (Å) |            |
| In1-N1      | 2.163(7)         | 2.200(3)   |
| In1-N2      | 2.287(7)         | 2.278(4)   |
| In1-N3      | 2.125(10)        | 2.186(4)   |
| In1-N4      | 2.290(7)         | 2.223(4)   |
| In1-N5      | 2.184(5)         | 2.211(3)   |
| In1-N6      | 2.264(5)         | 2.327(4)   |
| In1-N3'     |                  | 2.211(7)   |
| In1-N4'     |                  | 2.282(6)   |
|             | Angles (°)       |            |
| N1-In1-N2   | 75.1(3)          | 74.04(15)  |
| N1-In1-N3   | 104.9(3)         | 96.8(2)    |
| N1-In1-N6   | 157.0(3)         | 89.70(13)  |
| N2-In1-N3   | 100.0(3)         | 103.95(18) |
| N2-In1-N6   | 90.3(3)          | 92.87(13)  |
| N3-In1-N6   | 94.9(3)          | 163.06(17) |
| N4-In1-N1   | 99.5(3)          | 101.8(2)   |
| N4-In1-N2   | 171.6(3)         | 175.67(19) |
| N4-In1-N3   | 74.8(3)          | 75.2(2)    |
| N4-In1-N6   | 96.7(3)          | 88.19(18)  |
| N5-In1-N1   | 90.6(3)          | 156.01(14) |
| N5-In1-N2   | 94.6(3)          | 89.16(14)  |
| N5-In1-N3   | 160.9(3)         | 103.9(2)   |
| N5-In1-N4   | 92.0(3)          | 95.16(19)  |
| N5-In1-N6   | 72.6(3)          | 73.86(13)  |
| N3'-In1-N1  |                  | 103.6(2)   |
| N3'-In1-N2  |                  | 161.5(2)   |
| N3'-In1-N5  |                  | 97.7(2)    |
| N3'-In1-N6  |                  | 105.5(2)   |
| N3'-In1-N4' |                  | 74.6(3)    |
| N4'-In1-N1  |                  | 94.4(2)    |
| N4'-In1-N2  |                  | 87.1(2)    |
| N4'-In1-N5  |                  | 101.8(2)   |
| N4'-In1-N6  |                  | 175.68(19) |

#### 4. DFT Calculation

DFT calculations were performed by using the Gaussian 09 package<sup>[4]</sup>. Geometry optimizations were performed on the ground state structures with the Becke's three-parameter B3LYP exchange-correlation functional<sup>[5,6]</sup>. The all-electron Gaussian basis sets were those developed by the Ahlrichs group<sup>[7-9]</sup>. The slightly smaller polarized split-valence def2-SVP basis sets for H, C, N and In atom Vibrational frequencies were calculated based on the optimized structures to confirm the absence of imaginary frequencies. MOs of complexes were calculated and visualized as well. The excited states calculations were carried out on the basis of the optimized S0 structures via time-dependent DFT (TD-DFT)<sup>[10]</sup> at the same level. The solvation effects were also taken into account using the self-consistent reaction field (SCRF) and a universal solvation model density (SMD)<sup>[11]</sup> with the acetonitrile solvent.

##### **Input File Examples**

##### **Geometry Optimizations**

```
%chk=In-1.chk
```

```
%mem=6GB
```

```
%nprocshared=8
```

```
#p b3lyp/def2SVP opt freq geom=connectivity
```

```
opt for In-1
```

```
0 1
```

```
Coordinates
```

##### **TD-DFT Calculations**

```

%chk=In-1-uv.chk

%mem=6GB

%nprocshared=8

#p      td=(50-50,      nstates=50,      root=1)      b3lyp/def2SVP

SCRF(SMD,solvent=acetonitrile) geom=connectivity

uv for In-1

0 1

Coordinates

```

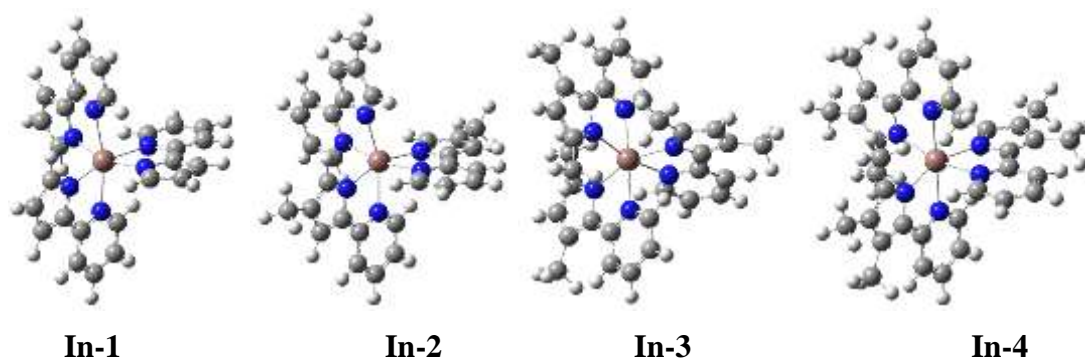

**Figure S14.** Optimized geometries for **In-1**, **In-2**, **In-3** and **In-4**

**Table S3.** Comparison of selected bond lengths (Å) and angles (°) of **In-1** and **In-3** from experimental and calculated results

| Bond<br>length/angle | Calc. (In-1) | Exp. (In-1) | Calc. (In-3) | Exp. (In-3) |
|----------------------|--------------|-------------|--------------|-------------|
| In-N1                | 2.19939      | 2.163(7)    | 2.22226      | 2.200(3)    |
| In-N2                | 2.34523      | 2.287(7)    | 2.33738      | 2.278(4)    |



|       |         |           |         |          |
|-------|---------|-----------|---------|----------|
| In-N3 | 2.20332 | 2.125(10) | 2.20492 | 2.186(4) |
| In-N4 | 2.34835 | 2.290(7)  | 2.34352 | 2.223(4) |
| In-N5 | 2.19892 | 2.184(5)  | 2.22436 | 2.211(3) |
| In-N6 | 2.38990 | 2.264(5)  | 2.35914 | 2.327(4) |

---

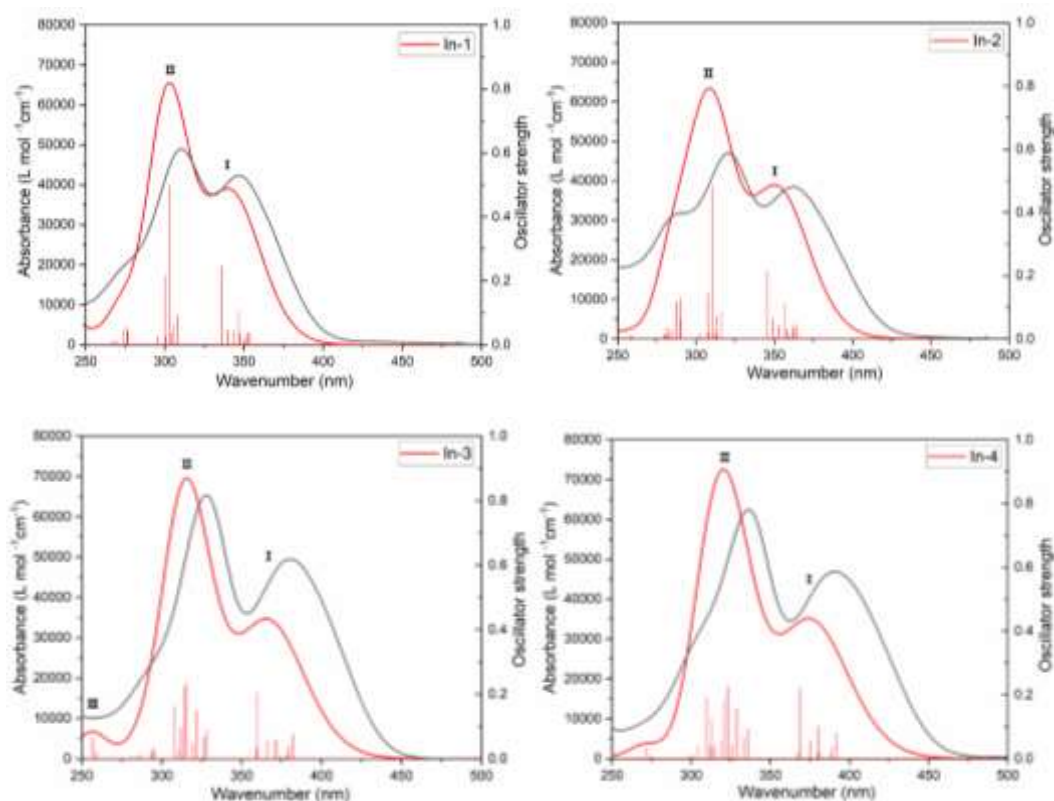

**Figure S15.** Electronic absorption spectrum of **In-1**, **In-2**, **In-3** and **In-4** obtained via TD-DFT calculations (red line, fwhm of 0.5 eV). The stick plot indicates the positions and relative intensities of individual transitions. Transitions with calculated oscillator strengths larger than 0.03 are labeled according to their TD-DFT state number. The experimental spectrum is shown as a black line for comparison.

**Table S4.** Vertical Electronic Excitation Energies and Main Excitations Contributing to the Absorption Bands of **In-1**, **In-2**, **In-3** and **In-4** Obtained via TD-DFT Calculations.

|                | band        | state    | E (eV) | $\lambda$<br>(nm) | $f_{osc}$ | Excitations<br>(weight) <sup>a,b</sup> | Character                                |                                          |
|----------------|-------------|----------|--------|-------------------|-----------|----------------------------------------|------------------------------------------|------------------------------------------|
| <b>In-1</b>    | <b>I</b>    | 16       | 3.5763 | 346.68            | 0.1077    | 122→125 (0.64)                         | <sup>1</sup> LLCT                        |                                          |
|                |             |          |        |                   |           | 123→125 (0.08)                         | <sup>1</sup> LLCT +<br><sup>1</sup> ILCT |                                          |
|                |             | 21       | 3.6885 | 336.14            | 0.2446    | 121→126 (0.74)                         | <sup>1</sup> LLCT +<br><sup>1</sup> ILCT |                                          |
|                | <b>II</b>   | 32       | 4.0952 | 302.76            | 0.4962    | 121→128 (0.27)                         | <sup>1</sup> LLCT                        |                                          |
|                |             |          |        |                   |           | 122→127 (0.20)                         | <sup>1</sup> LLCT +<br><sup>1</sup> ILCT |                                          |
|                |             |          |        |                   |           | 122→128 (0.23)                         | <sup>1</sup> LLCT                        |                                          |
|                |             | 35       | 4.1333 | 299.97            | 0.2183    | 123→129 (0.56)                         | <sup>1</sup> LLCT +<br><sup>1</sup> ILCT |                                          |
|                |             |          |        |                   |           | 121→129 (0.13)                         | <sup>1</sup> LLCT                        |                                          |
|                | <b>In-2</b> | <b>I</b> | 16     | 3.4743            | 356.86    | 0.1127                                 | 134→137 (0.57)                           | <sup>1</sup> LLCT +<br><sup>1</sup> ILCT |
| 133→138 (0.08) |             |          |        |                   |           |                                        | <sup>1</sup> LLCT +<br><sup>1</sup> ILCT |                                          |
| 134→136 (0.05) |             |          |        |                   |           |                                        | <sup>1</sup> LLCT +<br><sup>1</sup> ILCT |                                          |
| 19             |             |          | 3.5485 | 349.40            | 0.0646    | 134→138 (0.59)                         | <sup>1</sup> LLCT +<br><sup>1</sup> ILCT |                                          |
| 21             |             |          | 3.5853 | 345.81            | 0.2163    | 133→138 (0.79)                         | <sup>1</sup> LLCT +<br><sup>1</sup> ILCT |                                          |
| <b>II</b>      |             | 25       | 3.9192 | 316.35            | 0.0875    | 135→139 (0.85)                         | <sup>1</sup> LLCT +<br><sup>1</sup> ILCT |                                          |
|                |             |          |        |                   |           | 31                                     | 3.9890                                   | 310.82                                   |
|                |             |          |        |                   |           |                                        | 134→139 (0.20)                           | <sup>1</sup> LLCT +<br><sup>1</sup> ILCT |
|                |             |          |        |                   |           |                                        |                                          |                                          |

|             |           |    |        |        |        |                |                                          |
|-------------|-----------|----|--------|--------|--------|----------------|------------------------------------------|
|             |           |    |        |        |        | 133→140 (0.15) | <sup>1</sup> ILCT                        |
|             |           | 35 | 4.0307 | 307.60 | 0.1446 | 135→141 (0.52) | <sup>1</sup> LLCT +<br><sup>1</sup> ILCT |
|             |           |    |        |        |        | 134→140 (0.10) | <sup>1</sup> LLCT +<br><sup>1</sup> ILCT |
|             |           |    |        |        |        | 134→141 (0.08) | <sup>1</sup> LLCT +<br><sup>1</sup> ILCT |
| <b>In-3</b> | <b>I</b>  | 7  | 3.2414 | 382.51 | 0.0761 | 147→148 (0.88) | <sup>1</sup> LLCT +<br><sup>1</sup> ILCT |
|             |           |    |        |        |        | 145→148 (0.05) | <sup>1</sup> LLCT +<br><sup>1</sup> ILCT |
|             |           | 15 | 3.3356 | 371.69 | 0.0582 | 146→149 (0.00) | <sup>1</sup> LLCT +<br><sup>1</sup> ILCT |
|             |           | 16 | 3.3443 | 370.73 | 0.0577 | 145→149 (0.62) | <sup>1</sup> LLCT +<br><sup>1</sup> ILCT |
|             |           | 18 | 3.3850 | 366.27 | 0.0561 | 147→150 (0.64) | <sup>1</sup> LLCT +<br><sup>1</sup> ILCT |
|             |           |    |        |        |        | 146→150 (0.19) | <sup>1</sup> LLCT +<br><sup>1</sup> ILCT |
|             |           |    |        |        |        | 145→149 (0.07) | <sup>1</sup> LLCT +<br><sup>1</sup> ILCT |
|             |           | 20 | 3.4438 | 360.02 | 0.2040 | 146→150 (0.66) | <sup>1</sup> LLCT +<br><sup>1</sup> ILCT |
|             | <b>II</b> | 29 | 3.8479 | 322.21 | 0.1492 | 145→151 (0.41) | <sup>1</sup> LLCT +<br><sup>1</sup> ILCT |
|             |           |    |        |        |        | 146→152 (0.35) | <sup>1</sup> LLCT +<br><sup>1</sup> ILCT |
|             |           | 33 | 3.9283 | 315.62 | 0.2348 | 146→152 (0.41) | <sup>1</sup> LLCT +<br><sup>1</sup> ILCT |
|             |           |    |        |        |        | 147→153 (0.10) | <sup>1</sup> LLCT +<br><sup>1</sup> ILCT |
|             |           |    |        |        |        | 147→152 (0.08) | <sup>1</sup> LLCT +<br><sup>1</sup> ILCT |

|             |           |    |        |        |        |                |                                          |
|-------------|-----------|----|--------|--------|--------|----------------|------------------------------------------|
|             |           |    |        |        |        | 145→153 (0.08) | <sup>1</sup> LLCT +<br><sup>1</sup> ILCT |
|             |           | 34 | 3.9453 | 314.26 | 0.2250 | 147→153 (0.67) | <sup>1</sup> LLCT +<br><sup>1</sup> ILCT |
|             |           | 35 | 3.9700 | 312.31 | 0.0969 | 145→152 (0.51) | <sup>1</sup> LLCT +<br><sup>1</sup> ILCT |
|             |           |    |        |        |        | 146→152 (0.19) | <sup>1</sup> LLCT +<br><sup>1</sup> ILCT |
|             |           |    |        |        |        | 145→153 (0.09) | <sup>1</sup> LLCT +<br><sup>1</sup> ILCT |
|             |           | 39 | 4.0240 | 308.11 | 0.1632 | 145→153 (0.57) | <sup>1</sup> LLCT +<br><sup>1</sup> ILCT |
|             |           |    |        |        |        | 146→153 (0.26) | <sup>1</sup> LLCT +<br><sup>1</sup> ILCT |
| <b>In-4</b> | <b>I</b>  | 7  | 3.1621 | 392.10 | 0.0787 | 159→160 (0.89) | <sup>1</sup> LLCT +<br><sup>1</sup> ILCT |
|             |           | 16 | 3.2623 | 380.06 | 0.1015 | 157→161 (0.69) | <sup>1</sup> LLCT +<br><sup>1</sup> ILCT |
|             |           |    |        |        |        | 159→162 (0.09) | <sup>1</sup> LLCT +<br><sup>1</sup> ILCT |
|             |           |    |        |        |        | 159→161 (0.07) | <sup>1</sup> LLCT +<br><sup>1</sup> ILCT |
|             |           | 18 | 3.3050 | 375.14 | 0.0562 | 159→162 (0.70) | <sup>1</sup> LLCT +<br><sup>1</sup> ILCT |
|             |           |    |        |        |        | 158→162 (0.13) | <sup>1</sup> LLCT +<br><sup>1</sup> ILCT |
|             |           | 20 | 3.3650 | 368.45 | 0.2200 | 158→162 (0.64) | <sup>1</sup> LLCT +<br><sup>1</sup> ILCT |
|             |           |    |        |        |        | 157→162 (0.15) | <sup>1</sup> LLCT +<br><sup>1</sup> ILCT |
|             | <b>II</b> | 29 | 3.7691 | 328.95 | 0.1567 | 157→163 (0.58) | <sup>1</sup> LLCT +<br><sup>1</sup> ILCT |
|             |           |    |        |        |        | 159→163 (0.08) | <sup>1</sup> LLCT +                      |

|    |        |        |        |                |  |                                          |
|----|--------|--------|--------|----------------|--|------------------------------------------|
|    |        |        |        |                |  | <sup>1</sup> ILCT                        |
| 32 | 3.8385 | 323.00 | 0.2262 | 158→164 (0.48) |  | <sup>1</sup> LLCT +<br><sup>1</sup> ILCT |
|    |        |        |        | 159→164 (0.11) |  | <sup>1</sup> LLCT +<br><sup>1</sup> ILCT |
|    |        |        |        | 157→164 (0.07) |  | <sup>1</sup> LLCT +<br><sup>1</sup> ILCT |
|    |        |        |        | 158→165 (0.06) |  | <sup>1</sup> LLCT +<br><sup>1</sup> ILCT |
| 34 | 3.8607 | 321.14 | 0.1804 | 159→165 (0.63) |  | <sup>1</sup> LLCT +<br><sup>1</sup> ILCT |
|    |        |        |        | 155→160 (0.06) |  | <sup>1</sup> LLCT +<br><sup>1</sup> ILCT |
| 40 | 3.9667 | 312.57 | 0.1246 | 156→160 (0.67) |  | <sup>1</sup> LLCT +<br><sup>1</sup> ILCT |
|    |        |        |        | 158→164 (0.15) |  | <sup>1</sup> LLCT +<br><sup>1</sup> ILCT |
| 42 | 4.0016 | 309.84 | 0.1916 | 155→160 (0.32) |  | <sup>1</sup> LLCT +<br><sup>1</sup> ILCT |
|    |        |        |        | 156→161 (0.28) |  | <sup>1</sup> LLCT +<br><sup>1</sup> ILCT |
|    |        |        |        | 157→165 (0.22) |  | <sup>1</sup> LLCT +<br><sup>1</sup> ILCT |

---

<sup>a</sup> Only excitations contribution with a weight larger than 0.05 are shown. <sup>b</sup> for **In-1**: HOMO 123, LUMO 124; **In-2**: HOMO 135, LUMO 136; **In-3**: HOMO 147, LUMO 148; **In-4**: HOMO 159, LUMO 160.

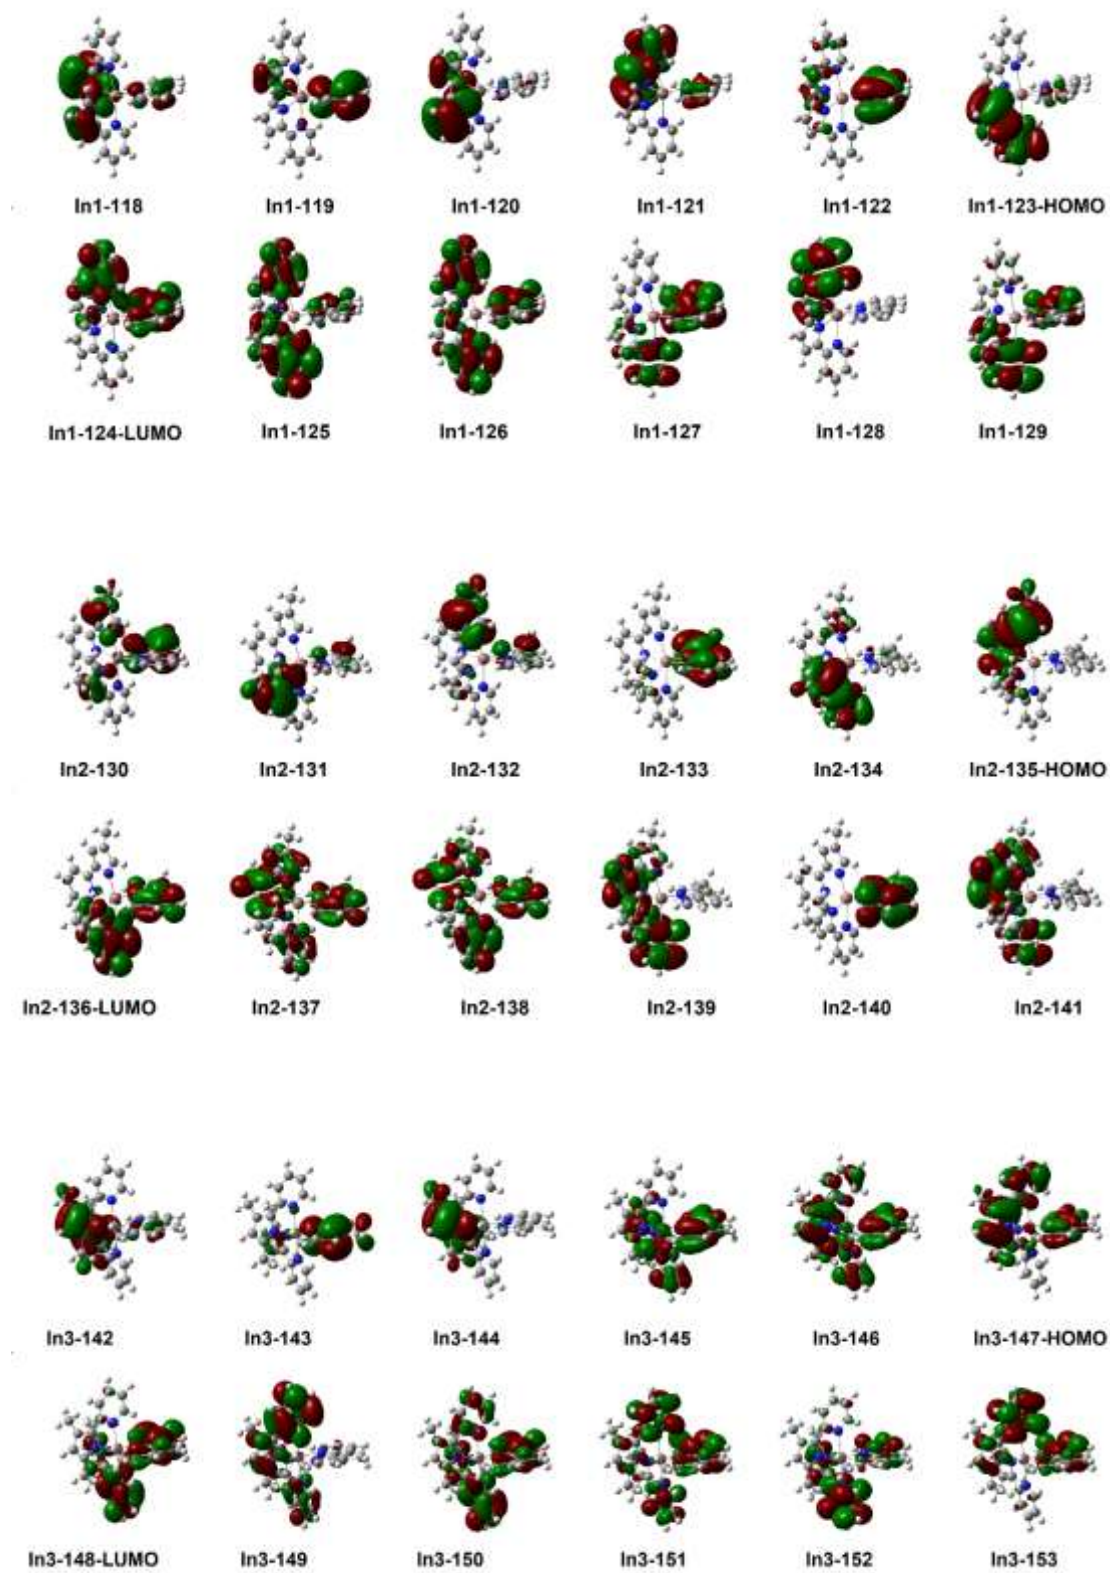

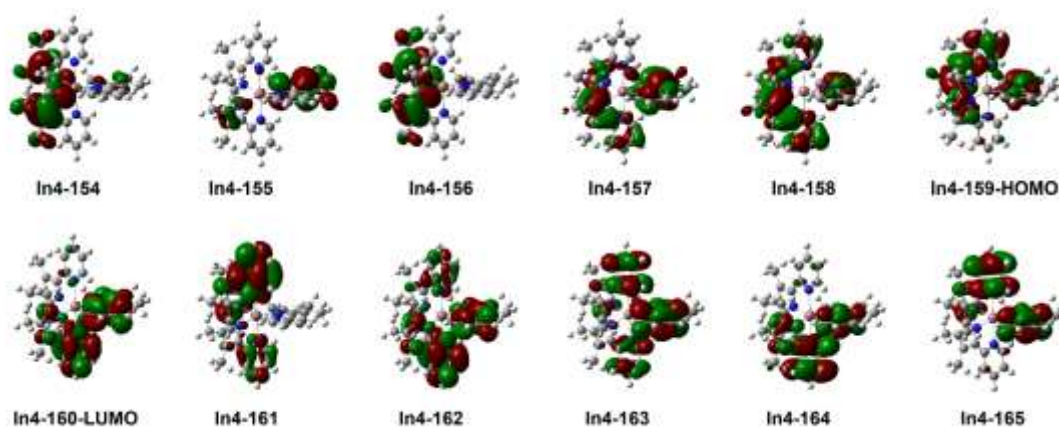

**Figure S16.** Frontier molecular orbital diagram of **In-1**, **In-2**, **In-3** and **In-4** showing the donor and acceptor orbitals contributing to TD-DFT excitations computed in visible region of electronic absorption spectrum.



## 5. Absorption and Emission Spectra in Various Solvents

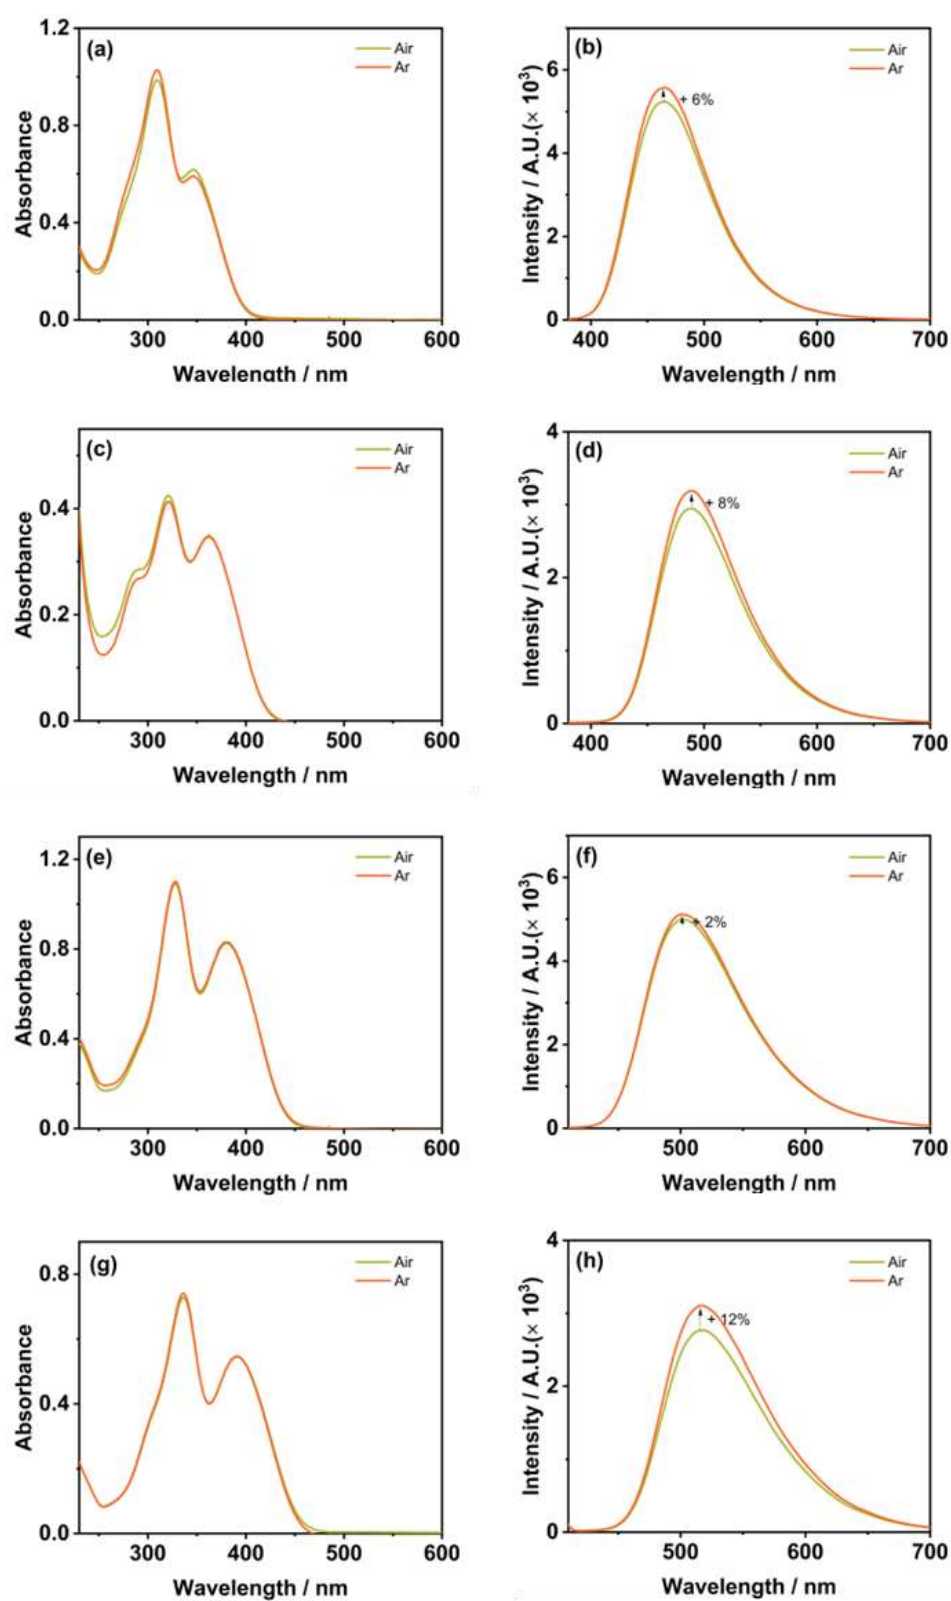

**Figure S17.** The absorption spectra (a) and emission spectra (b) of **In-1** in  $\text{CH}_3\text{CN}$  solution under argon atmosphere or upon exposure to air; The absorption spectra (c)

and emission spectra (d) of **In-2** in CH<sub>3</sub>CN solution under argon atmosphere or upon exposure to air; The absorption spectra (e) and emission spectra (f) of **In-3** in CH<sub>3</sub>CN solution under argon atmosphere or upon exposure to air; The absorption spectra (g) and emission spectra (h) of **In-4** in CH<sub>3</sub>CN solution under argon atmosphere or upon exposure to air.

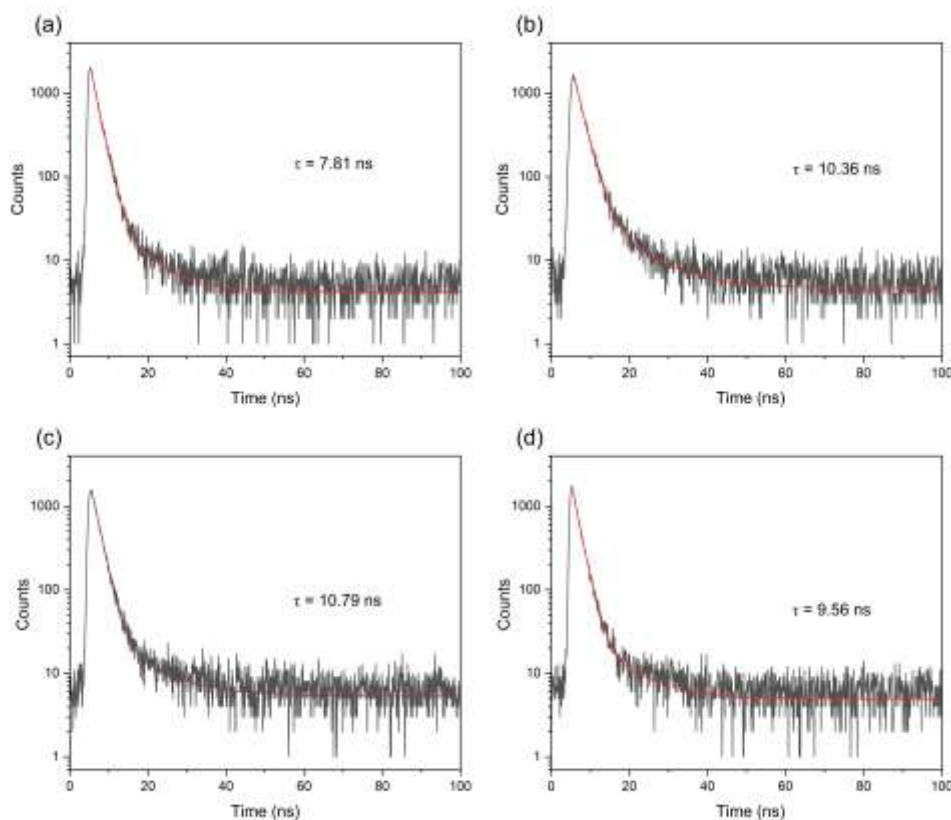

**Figure S18.** The excited state lifetimes of **In-1** (a), **In-2** (b), **In-3** (c) and **In-4** (d) in CH<sub>3</sub>CN measured by time-resolved fluorescence spectroscopy in N<sub>2</sub> atmosphere.

## 6. Cyclic Voltammetry

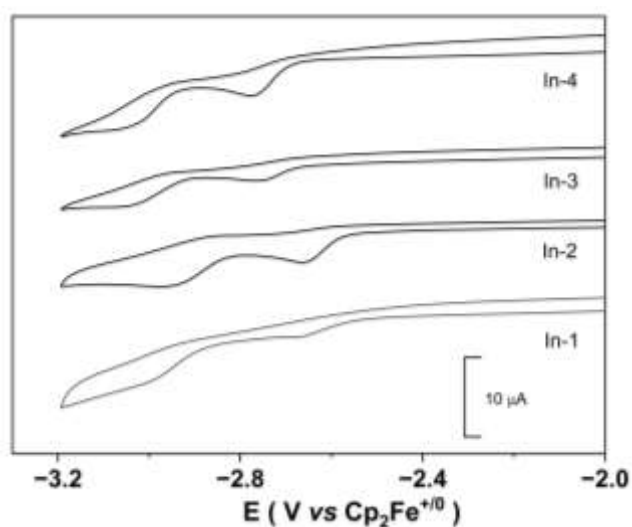

**Figure S19.** Reductive cyclic voltammetry of 0.1mM **In-1** - **In-4**, in degassed  $\text{CH}_3\text{CN}$  solution with scan rate at  $0.1 \text{ V s}^{-1}$ , electrolyte: 0.1 M  $\text{Bu}_4\text{NPF}_6$ , reference electrode:  $\text{AgCl}/\text{Ag}$  electrode in saturated  $\text{KCl}$  solution; counter electrode: Pt wire; working electrode: glassy carbon electrode,  $E$  vs.  $\text{Cp}_2\text{Fe}^{+/0}$ .

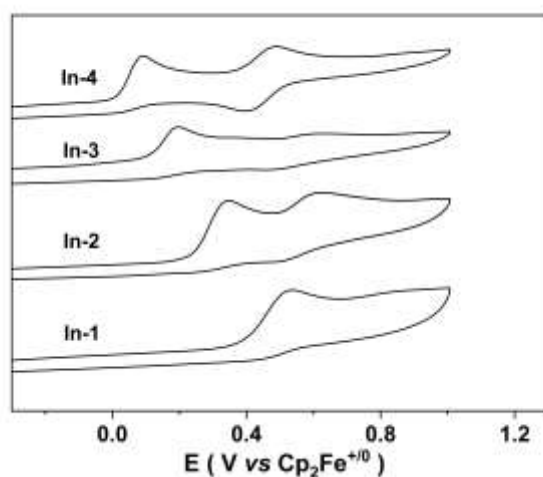

**Figure S20.** Oxidative cyclic voltammetry of 0.1mM **In-1** - **In-4**, in degassed  $\text{CH}_3\text{CN}$  solution with scan rate at  $0.1 \text{ V s}^{-1}$ , electrolyte: 0.1 M  $\text{Bu}_4\text{NPF}_6$ , reference electrode:  $\text{AgCl}/\text{Ag}$  electrode in saturated  $\text{KCl}$  solution; counter electrode: Pt wire; working electrode: glassy carbon electrode,  $E$  vs.  $\text{Cp}_2\text{Fe}^{+/0}$ .

## 7. Photoredox Catalysis

### 7.1 Experimental setup for photoredox reactions

All photoredox experiments were performed using Perfect Light PCX50C photochemistry system. Constant room temperature conditions were maintained using a water bath in a jacketed glass beaker with water cooling.

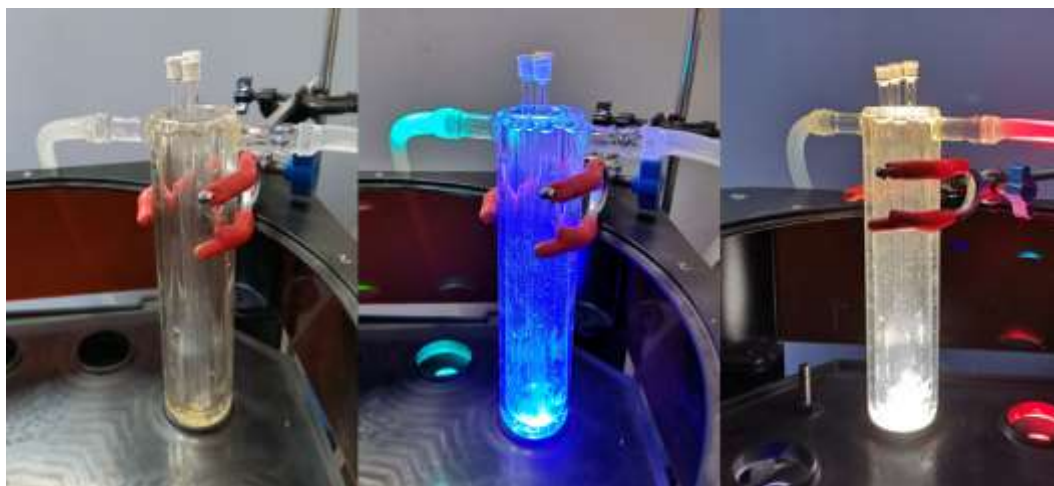

**Figure S21.** Experimental setup for irradiation of NMR tubes.

## 7.2 Indium(III) photosensitizers for photo-dehalogenation

The NMR tube was charged with photosensitizer (0.001 mmol, 1.0 equiv.), BIH (13.3 mg, 0.059 mmol, 59.0 equiv.), and ethyl bromodifluoroacetate (12.0 mg, 0.059 mmol, 59.0 equiv.) and C<sub>6</sub>D<sub>6</sub> (0.6 mL) in the dry-box. The mixture was placed in a jacketed glass beaker with water cooling (at r. t.) and irradiated with different light source for given time. 1,3,5-trimethoxybenzene as an internal standard was added into the reaction mixture, the yield was calculated by NMR spectroscopy.

**Table S5.** Condition optimization of photo-dehalogenation by indium(III) photosensitizers.

| Entry | Complex     | $\lambda$ (nm) | Yield <sup>a</sup> |
|-------|-------------|----------------|--------------------|
| 1     | <b>In-1</b> | 420            | 46                 |
| 2     | <b>In-1</b> | 450            | 50                 |
| 3     | <b>In-1</b> | White light    | 33                 |
| 4     | <b>In-2</b> | 420            | 15                 |
| 5     | <b>In-2</b> | 450            | 9                  |
| 6     | <b>In-2</b> | White light    | 7                  |
| 7     | <b>In-3</b> | 420            | 18                 |
| 8     | <b>In-3</b> | 450            | 46                 |
| 9     | <b>In-3</b> | White light    | 7                  |
| 10    | <b>In-4</b> | 420            | 24                 |
| 11    | <b>In-4</b> | 450            | 35                 |
| 12    | <b>In-4</b> | White light    | 12                 |
| 13    | <b>In-1</b> | -              | Trace              |
| 14    | <b>In-2</b> | -              | Trace              |
| 15    | <b>In-3</b> | -              | Trace              |
| 16    | <b>In-4</b> | -              | Trace              |
| 17    | -           | 420            | 10                 |
| 18    | -           | 450            | 9                  |
| 19    | -           | White light    | 8                  |

<sup>a</sup> The yield was calculated by using 1,3,5-trimethoxybenzene as the internal standard, reaction time: 1 h.

a)

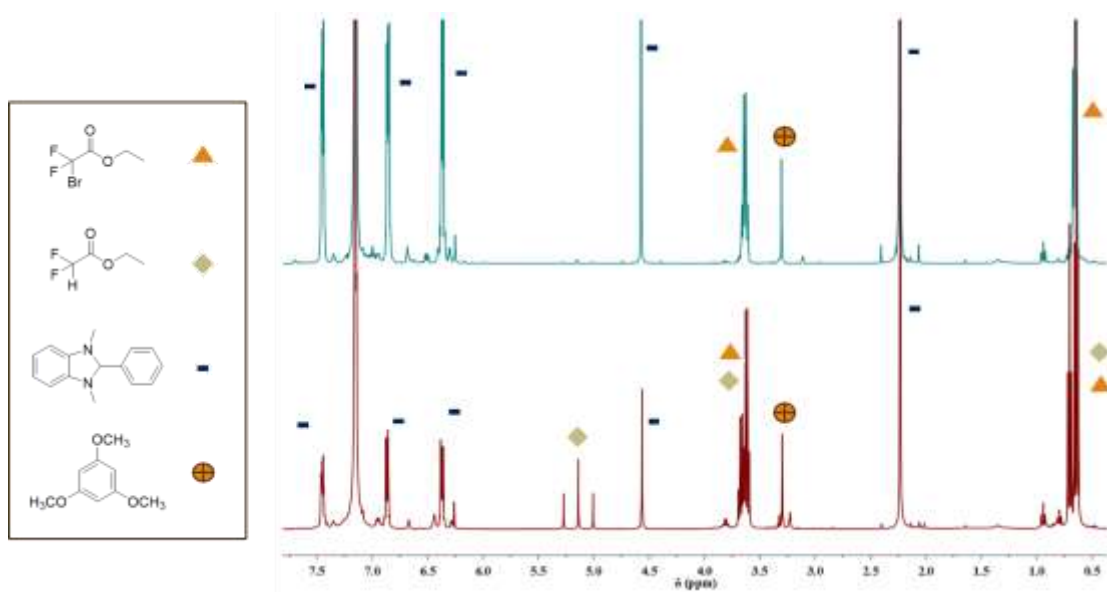

b)

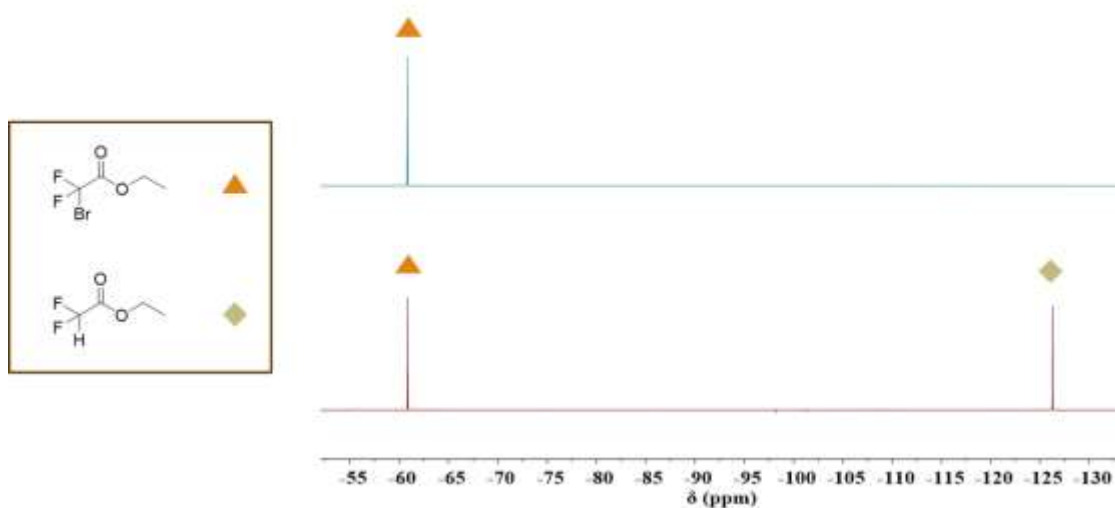

**Figure S22.** a)  $^1\text{H}$  NMR spectra and b)  $^{19}\text{F}$  NMR spectra of reaction mixture of ethyl bromodifluoroacetate and BIH in presence of catalyst **In-1** and internal standard 1,3,5-trimethoxybenzene before and after irradiation of 450 nm in  $\text{C}_6\text{D}_6$ .  
 grayish green line: ethyl bromodifluoroacetate + BIH + internal standard + **In-1**, 0 h;  
 brown line: ethyl bromodifluoroacetate + BIH + internal standard + **In-1**, 1 h;

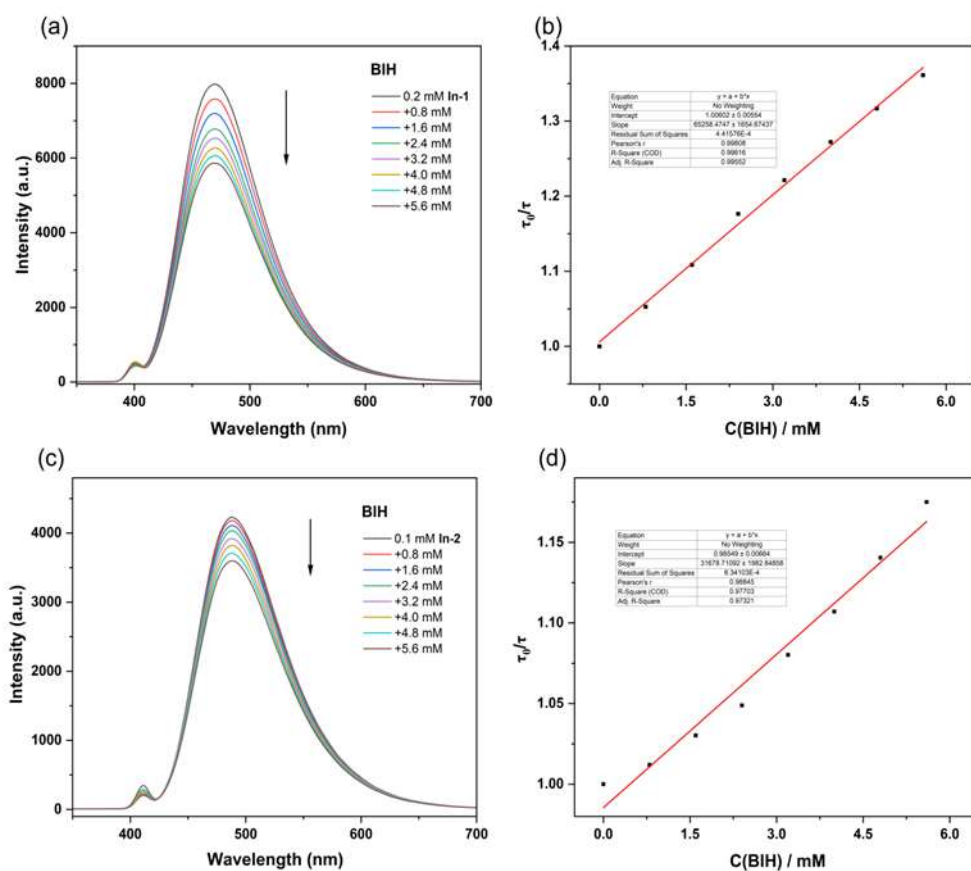

**Figure S23.** The fluorescence quenching curves of (a) **In-1**, (c) **In-2** with BIH. (b)(d) BIH on **In-1** and **In-2** Stern-Volmer quenching curve.  $K_q(\text{In-1})=8.37 \times 10^9 \text{ M}^{-1}\text{S}^{-1}$ ;  $K_q(\text{In-2})=3.05 \times 10^9 \text{ M}^{-1}\text{S}^{-1}$

### 7.3 Indium(III) photosensitizers for reduction of cis-diethyl maleate

The NMR tube was charged with photosensitizers (1 mg, 0.001 mmol, 1.0 equiv.), BIH (10.8 mg, 0.048 mmol, 48.0 equiv.), and cis-diethyl maleate (4.1 mg, 0.024 mmol, 24.0 equiv.) and 0.6 mL C<sub>6</sub>D<sub>6</sub> in the dry-box. The mixture was placed in a water-cooled glass vessel and irradiated with different irradiation. 1,3,5-trimethoxybenzene was added as an internal standard. The products were analyzed by <sup>1</sup>H NMR spectroscopy and the yields are based on internal standard. The <sup>1</sup>H NMR spectroscopic data of diethyl maleate, diethyl fumarate, and diethyl succinate in C<sub>6</sub>D<sub>6</sub> and CDCl<sub>3</sub> were established from commercially available pure materials.

**Table S6.** Reduction of cis-diethyl maleate using indium(III) photosensitizers.

| Entry | Complex     | λ (nm) | Yield (a/b) <sup>a</sup> |
|-------|-------------|--------|--------------------------|
| 1     | <b>In-1</b> | 450    | 38:22                    |
| 2     | <b>In-2</b> | 450    | 40:60                    |
| 3     | <b>In-3</b> | 450    | 73:26                    |
| 4     | <b>In-4</b> | 450    | 61:39                    |
| 5     | <b>In-1</b> | -      | Trace                    |
| 6     | <b>In-2</b> | -      | Trace                    |
| 7     | <b>In-3</b> | -      | Trace                    |
| 8     | <b>In-4</b> | -      | Trace                    |
| 9     | -           | 450    | Trace                    |

<sup>a</sup> The yield was calculated by using 1,3,5-trimethoxybenzene as the internal standard.  
The reaction time: 2 h.



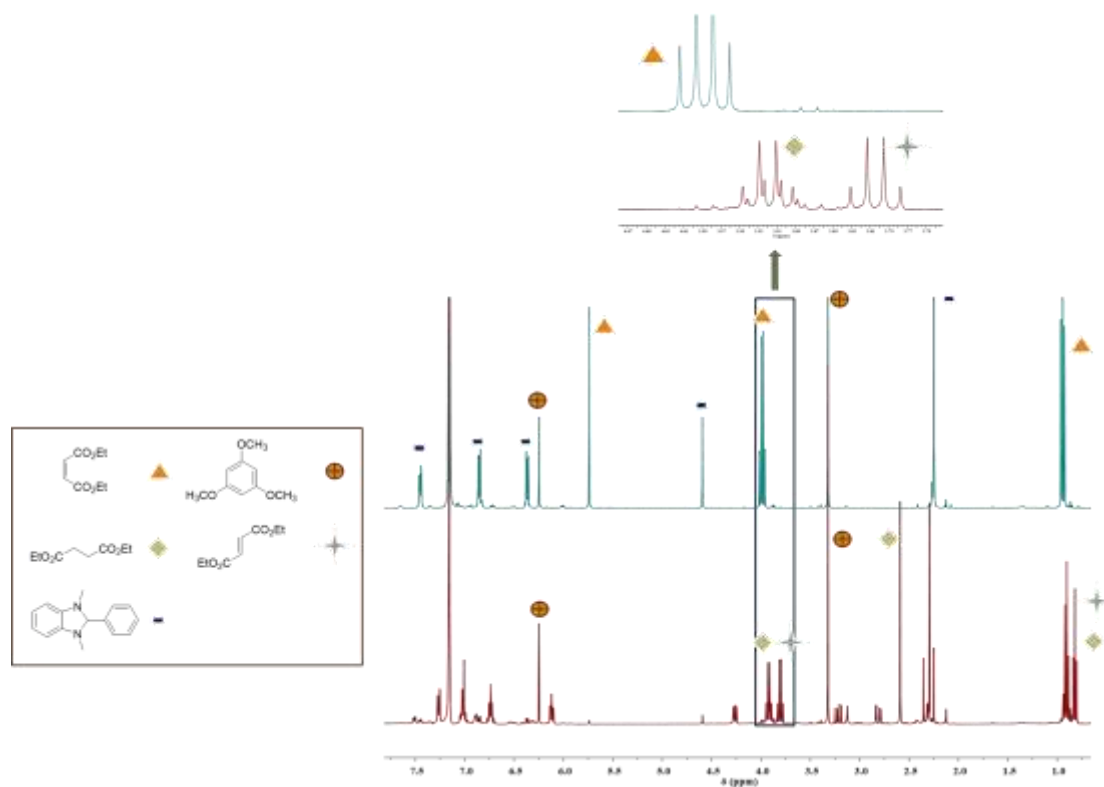

**Figure S24.**  $^1\text{H}$  NMR spectra of reaction mixture of diethyl maleate, BIH and in presence of catalyst **In-2** and internal standard 1,3,5-trimethoxybenzene before and after irradiation of 450 nm in  $\text{C}_6\text{D}_6$ .

grayish green line: diethyl maleate + BIH + internal standard + **In-2**, 0 h;

brown line: diethyl maleate + BIH + internal standard + **In-2**, 2 h.

## 8. References

1. Duclouset, C.; Jouin, P.; Paredes, E.; Guillot, R.; Sircoglou, M.; Orio, M.; Leibl, W.; Aukauloo, A. Monoanionic dipyrin–pyridine ligands: synthesis, structure and photophysical properties. *Eur. J. Inorg. Chem.*, **2015**, 32, 5405-5410.
2. Klappa, J. J.; Rich, A. E.; McNeill, K. One-step synthesis of 3, 5-disubstituted-2-pyridylpyrroles from the condensation of 1, 3-diones and 2-(aminomethyl) pyridine. *Org. Lett.*, **2002**, 4, 435-437.
3. Reichardt, C. Empirical parameters of solvent polarity as linear free-energy relationships. *Angew. Chem. Int. Ed.*, **1979**, 18, 98-110.
4. Frisch, M. J., Trucks, G. W., Schlegel, H. B., Scuseria, G. E., Robb, M. A., Cheeseman, J. R., Scalmani, G., Barone, V., Mennucci, B., Petersson, G. A., Nakatsuji, H., Caricato, M., Li, X., Hratchian, H. P., Izmaylov, A. F., Bloino, J., Zheng, G., Sonnenberg, J. L., Hada, M., Ehara, M., Toyota, K., Fukuda, R., Hasegawa, J., Ishida, M., Nakajima, T., Honda, Y., Kitao, O., Nakai, H., Vreven, T., Montgomery, J. A., Jr., Peralta, J. E., Ogliaro, F., Bearpark, M., Heyd, J. J., Brothers, E., Kudin, K. N., Staroverov, V. N., Keith, T., Kobayashi, R., Normand, J., Raghavachari, K., Rendell, A., Burant, J. C., Iyengar, S. S., Tomasi, J., Cossi, M., Rega, N., Millam, N. J., Klene, M., Knox, J. E., Cross, J. B., Bakken, V., Adamo, C., Jaramillo, J., Gomperts, R., Stratmann, R. E., Yazyev, O., Austin, A. J., Cammi, R., Pomelli, C., Ochterski, J. W., Martin, R. L., Morokuma, K., Zakrzewski, V. G., Voth, G. A., Salvador, P., Dannenberg, J. J., Dapprich, S., Daniels, A. D., Farkas, O., Foresman, J. B., Ortiz, J. V., Cioslowski, J. & Fox, D. *J. Gaussian 09, Revision D.01*; Gaussian, Inc.: Wallingford CT, 2009.
5. Becke, A. D., *J. Chem. Phys.*, **1993**, 98 (7), 5648-5652.
6. Lee, C., Yang, W. and Parr, R. G., *Phys. Rev. B*, **1988**, 37 (2), 785-789.
7. Schäfer, A., Horn, H. and Ahlrichs, R., *J. Chem. Phys.*, **1992**, 97, 2571.
8. Schäfer, A., Huber, C. and Ahlrichs, R., *J. Chem. Phys.*, **1994**, 100, 5829.
9. Weigend, F. and Ahlrichs, R., *Phys. Chem. Chem. Phys.*, **2005**, 7, 3297.
10. Fantacci, S., De Angelis, F. and Selloni, A., *J. Am. Chem. Soc.*, **2003**, 125 (14), 4381-4387.
11. Marenich A. V., Cramer C. J., and Truhlar D. G. *J. Phys. Chem. B*, **2009**, 113, 6378-6396.
